# Supplementary material for: The Complete Genome and Physiological Analysis of the Microbialite-Dwelling Agrococcus pavilionensis sp. nov; Reveals Genetic Promiscuity and Predicted Adaptations to Environmental Stress
Source: Front Microbiol. 2018 Oct 15;9:2180. doi: 10.3389/fmicb.2018.02180 (PMC6196244; doi:10.3389/fmicb.2018.02180)
Supplement: TABLE S1 — Final assembly statistics. ∗Published in White and Suttle (2013). [file Table_1.XLSX]

## Sheet: Table1
	Strain RW1	A.lahaulensis1 K22-21	A.baldri1 V-108	A.citreus1 D-1/1a	A.jenensis1 2002-39/1	A.terreus1 DNG5
Habitat	microbialite	desert soil	air	painting	sandstone	forest soil
Cell size (µm)
Length	0.5 - 0.7	1.0 - 1.5	1.1 - 1.7	1.1 - 1.7	0.7 - 1.7	0.8 - 1.0
width	0.3 - 0.5	0.6 - 1.0	0.7 - 1.0	0.7 - 1.0	0.7 - 1.0	0.4 - 0.5
Growth range (˚C)
11	+	NA	NA	NA	NA	NA
30	+	+	+	+	+	+
37	+	+	W	+	V	+
42	+	-	-	NA	-	NA
pH growth
6	+	+	NA	NA	NA	+
7	+	+	+	+	+	+
10	+	+	NA	NA	NA	-
NaCl tolerance
0%	+	NA	NA	NA	NA	+
6%	+	+	+	+	NA	-
7%	-	+	NA	+	NA	-
